# Supplementary material for: First-principles exploration of oxygen vacancy impact on electronic and optical properties of ABO3−δ (A = La, Sr; B = Cr, Mn) perovskites
Source: Royal Society of Chemistry journal article supplement (doi:10.1039/d0cp05445c), 2020-01-01
Supplement: d0cp05445c1.pdf [file d0cp05445c1.pdf]

## Supplementary Information for

### **First-Principles Exploration of Oxygen Vacancy Impact on Electronic and Optical Properties of $\text{ABO}_{3-\delta}$ (A = La, Sr; B = Cr, Mn) Perovskites**

Jongwoo Park<sup>1</sup>, Yu-Ning Wu<sup>1</sup>, Wissam A. Saidi<sup>1,2</sup>, Benjamin Chorpening<sup>1</sup>, and Yuhua Duan<sup>1\*</sup>

<sup>1</sup> National Energy Technology Laboratory, United States Department of Energy, Pittsburgh, PA 15236 USA

<sup>2</sup> Department of Mechanical Engineering and Materials Science, University of Pittsburgh, Pittsburgh, PA 15261 USA

\* Corresponding author. E-mail: yuhua.duan@netl.doe.gov.

#### **Table of Contents**

##### **S1. Oxygen Vacancy Formation Energy**

**Table S1.** Formation energy of oxygen mono-vacancy ( $\Delta H^q$ ) employing different vacancy charge states ( $q$ ) as a function of Fermi level ( $E_F$ ) for  $\text{LaCrO}_3$  (Fig. 2a).

**Table S2.** Formation energy of oxygen mono-vacancy ( $\Delta H^q$ ) employing different vacancy charge states ( $q$ ) as a function of Fermi level ( $E_F$ ) for  $\text{LaMnO}_3$  (Fig. 2b).

**Table S3.** Formation energy of oxygen mono-vacancy ( $\Delta H^q$ ) employing different vacancy charge states ( $q$ ) as a function of Fermi level ( $E_F$ ) for  $\text{SrCrO}_3$  (Fig. 2c).

**Table S4.** Formation energy of oxygen mono-vacancy ( $\Delta H^q$ ) employing different vacancy charge states ( $q$ ) as a function of Fermi level ( $E_F$ ) for  $\text{SrMnO}_3$  (Fig. 2d).

##### **S2. Electronic Band Structures of Oxygen-Vacant $\text{LaCrO}_3$ and $\text{LaMnO}_3$**

**Fig. S1.** Electronic band structures along the high-symmetry paths in the first Brillouin zones and PDOS for oxygen-vacant (a)  $\text{LaCrO}_3 v_{\text{O}}^q$  and (b)  $\text{LaMnO}_3 v_{\text{O}}^q$ . Zero of the energy ( $E$ ) scale is position of the Fermi level ( $E_F$ ) set in the middle between the band edges.

**Fig. S2.** Charge density maps for (a) AFM-G magnetic ordered  $\text{LaCrO}_3 (v_{\text{O}}^q)$  and (b) FM magnetic ordered  $\text{LaMnO}_3 (v_{\text{O}}^q)$ . The maps are shown with primitive cells for pristine  $\text{LaCrO}_3$  and  $\text{LaMnO}_3$ , and with  $2 \times 1 \times 1$  supercells for oxygen-vacant  $\text{LaCrO}_3 v_{\text{O}}^q$  and  $\text{LaMnO}_3 v_{\text{O}}^q$ . Charge density in space is depicted by smooth shadings with the color scheme (indicated with a bar on the right) for the charge density isovalue.

##### **References**

## S1. Oxygen Vacancy Formation Energy

Tables S1 - S4 curate the numerical data of the formation energy of oxygen mono-vacancy in  $ABO_3$  ( $A = \text{La, Sr}$ ,  $B = \text{Cr, Mn}$ ) perovskites with different valence charges as a function of Fermi level shown in Fig. 2 of the main text.

**Table S1.** Formation energy of oxygen mono-vacancy ( $\Delta H^q$ ) employing different vacancy charge states ( $q$ ) as a function of Fermi level ( $E_F$ ) for  $\text{LaCrO}_3$  (Fig. 2a).

| $q = 0$ ( $\text{v}_O^0$ ) * |                   | $q = 1+$ ( $\text{v}_O^{1+}$ ) |                   | $q = 2+$ ( $\text{v}_O^{2+}$ ) |                   |
|------------------------------|-------------------|--------------------------------|-------------------|--------------------------------|-------------------|
| $E_F$ (eV)                   | $\Delta H^q$ (eV) | $E_F$ (eV)                     | $\Delta H^q$ (eV) | $E_F$ (eV)                     | $\Delta H^q$ (eV) |
| 0.00                         | 4.95              | 0.00                           | 4.05              | 0.00                           | 3.15              |
| 0.25                         | 4.95              | 0.25                           | 4.30              | 0.25                           | 3.65              |
| 0.50                         | 4.95              | 0.50                           | 4.55              | 0.50                           | 4.15              |
| 0.75                         | 4.95              | 0.75                           | 4.80              | 0.75                           | 4.65              |
| 1.00                         | 4.95              | 1.00                           | 5.05              | 1.00                           | 5.15              |
| 1.25                         | 4.95              | 1.25                           | 5.30              | 1.25                           | 5.65              |
| 1.50                         | 4.95              | 1.50                           | 5.55              | 1.50                           | 6.15              |

\* Due to the nature of eqn. (1) discussed in the main text,  $\Delta H^q$  does not vary with  $E_F$  when  $q = 0$ .

**Table S2.** Formation energy of oxygen mono-vacancy ( $\Delta H^q$ ) employing different vacancy charge states ( $q$ ) as a function of Fermi level ( $E_F$ ) for  $\text{LaMnO}_3$  (Fig. 2b).

| $q = 0$ ( $\text{v}_O^0$ ) * |                   | $q = 1+$ ( $\text{v}_O^{1+}$ ) |                   | $q = 2+$ ( $\text{v}_O^{2+}$ ) |                   |
|------------------------------|-------------------|--------------------------------|-------------------|--------------------------------|-------------------|
| $E_F$ (eV)                   | $\Delta H^q$ (eV) | $E_F$ (eV)                     | $\Delta H^q$ (eV) | $E_F$ (eV)                     | $\Delta H^q$ (eV) |
| 0.00                         | 3.48              | 0.00                           | 3.32              | 0.00                           | 3.30              |
| 0.10                         | 3.48              | 0.10                           | 3.42              | 0.10                           | 3.50              |
| 0.20                         | 3.48              | 0.20                           | 3.52              | 0.20                           | 3.70              |
| 0.30                         | 3.48              | 0.30                           | 3.62              | 0.30                           | 3.90              |
| 0.40                         | 3.48              | 0.40                           | 3.72              | 0.40                           | 4.10              |
| 0.50                         | 3.48              | 0.50                           | 3.82              | 0.50                           | 4.30              |

\* Due to the nature of eqn. (1) discussed in the main text,  $\Delta H^q$  does not vary with  $E_F$  when  $q = 0$ .

**Table S3.** Formation energy of oxygen mono-vacancy ( $\Delta H^q$ ) employing different vacancy charge states ( $q$ ) as a function of Fermi level ( $E_F$ ) for SrCrO<sub>3</sub> (Fig. 2c).

| $q = 0$ ( $v_{O^0}$ ) * |                   | $q = 1+$ ( $v_{O^{1+}}$ ) |                   | $q = 2+$ ( $v_{O^{2+}}$ ) |                   |
|-------------------------|-------------------|---------------------------|-------------------|---------------------------|-------------------|
| $E_F$ (eV)              | $\Delta H^q$ (eV) | $E_F$ (eV)                | $\Delta H^q$ (eV) | $E_F$ (eV)                | $\Delta H^q$ (eV) |
| 0.00                    | 4.32              | 0.00                      | 3.93              | 0.00                      | 3.53              |
| 0.25                    | 4.32              | 0.25                      | 4.18              | 0.25                      | 4.03              |
| 0.50                    | 4.32              | 0.50                      | 4.43              | 0.50                      | 4.53              |
| 0.75                    | 4.32              | 0.75                      | 4.68              | 0.75                      | 5.03              |
| 1.00                    | 4.32              | 1.00                      | 4.93              | 1.00                      | 5.53              |

\* Due to the nature of eqn. (1) discussed in the main text,  $\Delta H^q$  does not vary with  $E_F$  when  $q = 0$ .

**Table S4.** Formation energy of oxygen mono-vacancy ( $\Delta H^q$ ) employing different vacancy charge states ( $q$ ) as a function of Fermi level ( $E_F$ ) for SrMnO<sub>3</sub> (Fig. 2d).

| $q = 0$ ( $v_{O^0}$ ) * |                   | $q = 1+$ ( $v_{O^{1+}}$ ) |                   | $q = 2+$ ( $v_{O^{2+}}$ ) |                   |
|-------------------------|-------------------|---------------------------|-------------------|---------------------------|-------------------|
| $E_F$ (eV)              | $\Delta H^q$ (eV) | $E_F$ (eV)                | $\Delta H^q$ (eV) | $E_F$ (eV)                | $\Delta H^q$ (eV) |
| 0.00                    | 1.48              | 0.00                      | 1.05              | 0.00                      | 0.78              |
| 0.20                    | 1.48              | 0.20                      | 1.25              | 0.20                      | 1.18              |
| 0.40                    | 1.48              | 0.40                      | 1.45              | 0.40                      | 1.58              |
| 0.60                    | 1.48              | 0.60                      | 1.65              | 0.60                      | 1.98              |
| 0.80                    | 1.48              | 0.80                      | 1.85              | 0.80                      | 2.38              |
| 1.00                    | 1.48              | 1.00                      | 2.05              | 1.00                      | 2.78              |

\* Due to the nature of eqn. (1) discussed in the main text,  $\Delta H^q$  does not vary with  $E_F$  when  $q = 0$ .

## S2. Electronic Band Structures of Oxygen-Vacant $\text{LaCrO}_3$ and $\text{LaMnO}_3$

Fig. S1 shows the electronic band structures, and atom- and angular-momentum projected PDOS for oxygen-vacant  $\text{LaCrO}_3$  and  $\text{LaMnO}_3$  with different vacancy charges discussed in Fig. 4 of the main text. PDOS of oxygen-vacant  $v_{\text{O}}^q$  states of  $\text{LaCrO}_3$  and  $\text{LaMnO}_3$  are reproduced from Fig. 4 for complete comparisons.

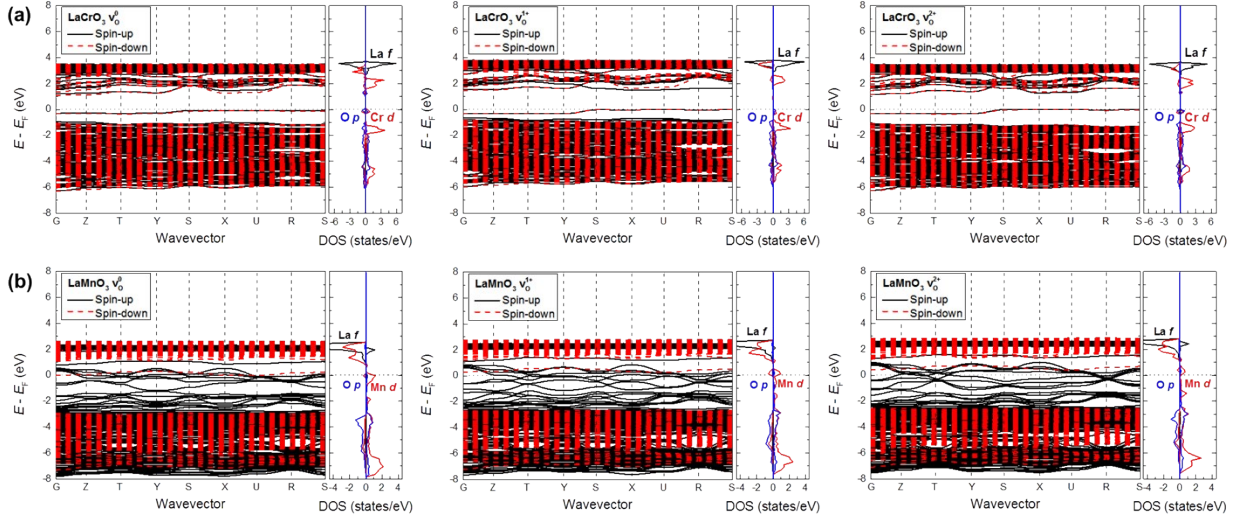

**Fig. S1.** Electronic band structures along the high-symmetry paths in the first Brillouin zones and PDOS for oxygen-vacant (a)  $\text{LaCrO}_3$   $v_{\text{O}}^q$  and (b)  $\text{LaMnO}_3$   $v_{\text{O}}^q$ . Zero of the energy ( $E$ ) scale is position of the Fermi level ( $E_{\text{F}}$ ) set in the middle between the band edges.

Fig. S2 shows the electronic charge density displaying the density of electrons in pristine and oxygen-vacant  $\text{LaCrO}_3$  and  $\text{LaMnO}_3$  to examine the electron distribution of these systems.<sup>1</sup> The charge density isovalue is higher in pristine  $\text{LaCrO}_3$  than in  $\text{LaMnO}_3$ . In each material, the charge density isovalues are increased (i.e. when closing to the nuclues of atoms) in oxygen-vacant systems relative to the corresponding pristine materials. Nonetheless the impact of neutral and/or charged vacancy on their charge density maps is not eye-catching.

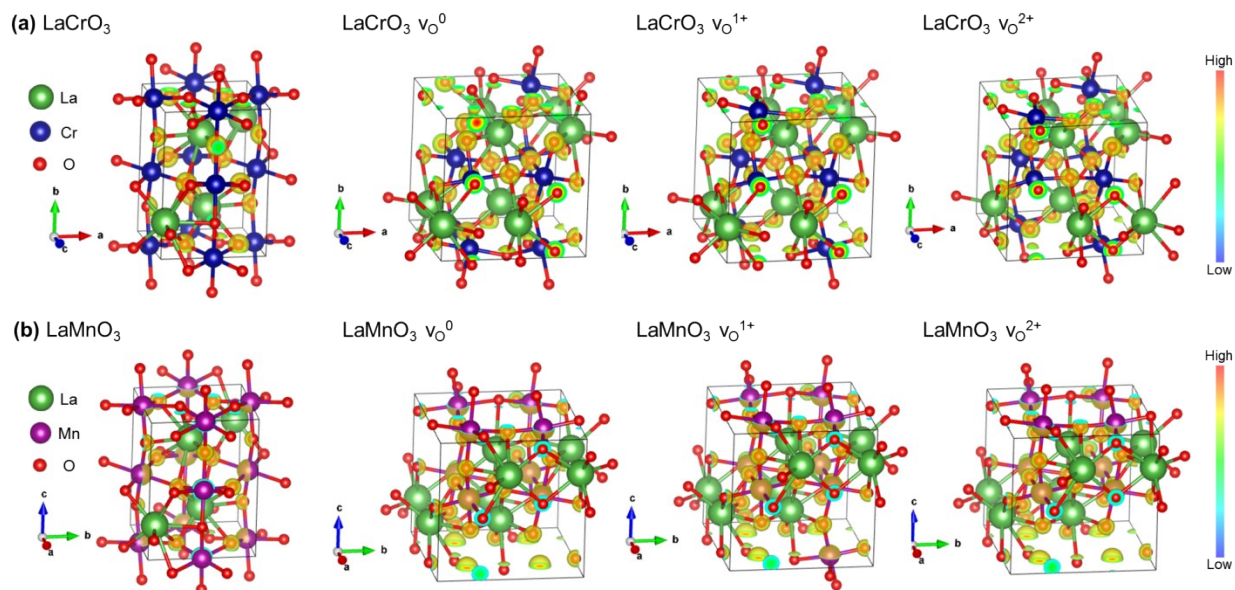

**Fig. S2.** Charge density maps for (a) AFM-G magnetic ordered  $\text{LaCrO}_3$  ( $v_{\text{O}}^q$ ) and (b) FM magnetic ordered  $\text{LaMnO}_3$  ( $v_{\text{O}}^q$ ). The maps are shown with primitive cells for pristine  $\text{LaCrO}_3$  and  $\text{LaMnO}_3$ , and with  $2 \times 1 \times 1$  supercells for oxygen-vacant  $\text{LaCrO}_3 v_{\text{O}}^q$  and  $\text{LaMnO}_3 v_{\text{O}}^q$ . Charge density in space is depicted by smooth shadings with the color scheme (indicated with a bar on the right) for the charge density isovalue.

## References

1 C. Gatti and P. Macchi, *A Guided Tour Through Modern Charge Density Analysis. In Modern Charge-Density Analysis*, Springer, Dordrecht, 2011.
